# Supplementary material for: Ionosphere Over Eastern North Atlantic Midlatitudinal Zone During Geomagnetic Storms
Source: Preprints.org preprint supplement (doi:10.20944/preprints202305.0171.v1), 2023-05-04
Supplement: Supplementary file 1 [file supplementary]

Supplementary Materials:

Teresa Barata 1,2, Joana Pereira1,3, Manuel Pajares4,5, Tatiana Barlayeva 1 and Anna Morozova 1,3


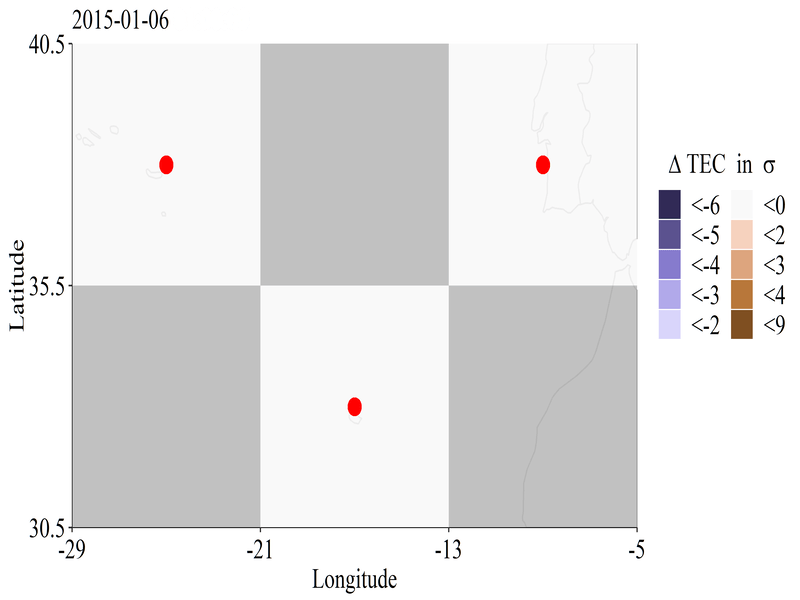


**Figure S1.** Animations showing average ΔTEC variations (in σ units – semi-transparent colour scale) for the studied locations for each of the analysed storms. January 2015.


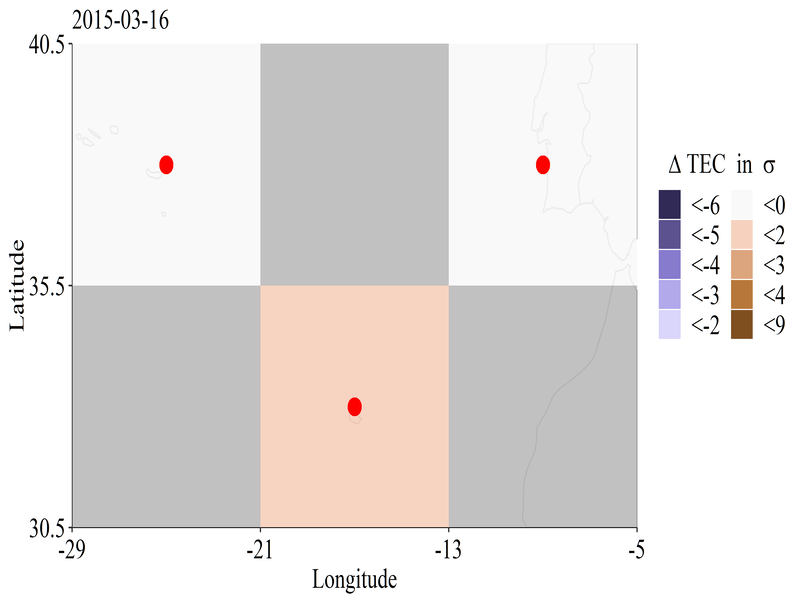


**Figure S2.** Animations showing average ΔTEC variations (in σ units – semi-transparent colour scale) for the studied locations for each of the analysed storms, March 2015.


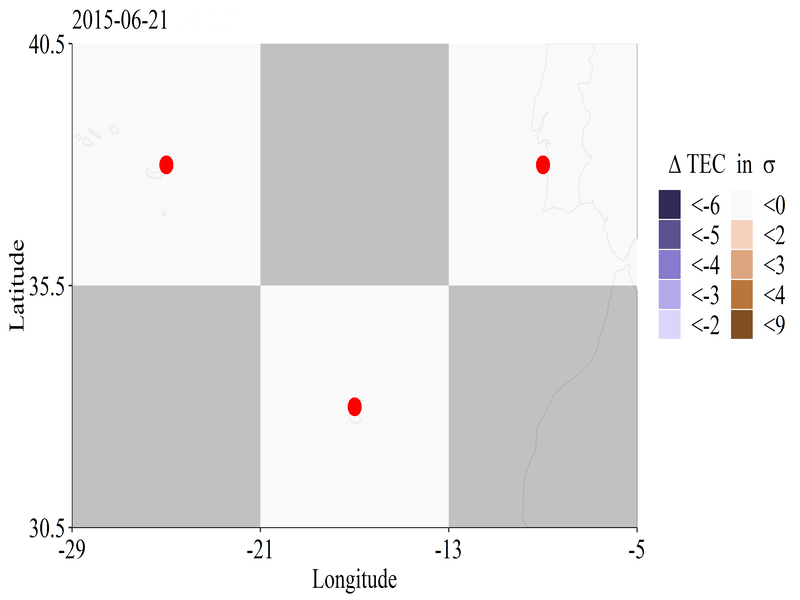


**Figure S3.** : Animations showing average ΔTEC variations (in σ units – semi-transparent colour scale) for the studied locations for each of the analysed storms. June 2015.


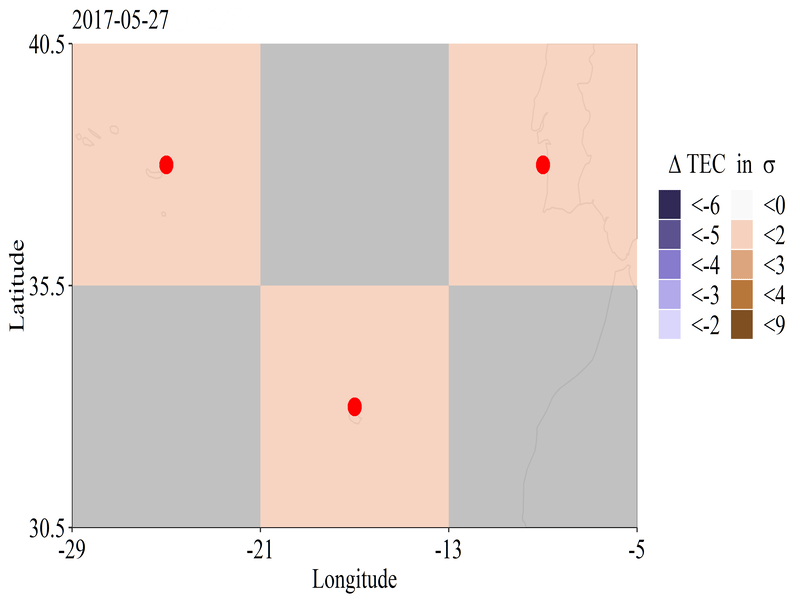


**Figure S4.** Animations showing average ΔTEC variations (in σ units – semi-transparent colour scale) for the studied locations for each of the analysed storms. May 2017.


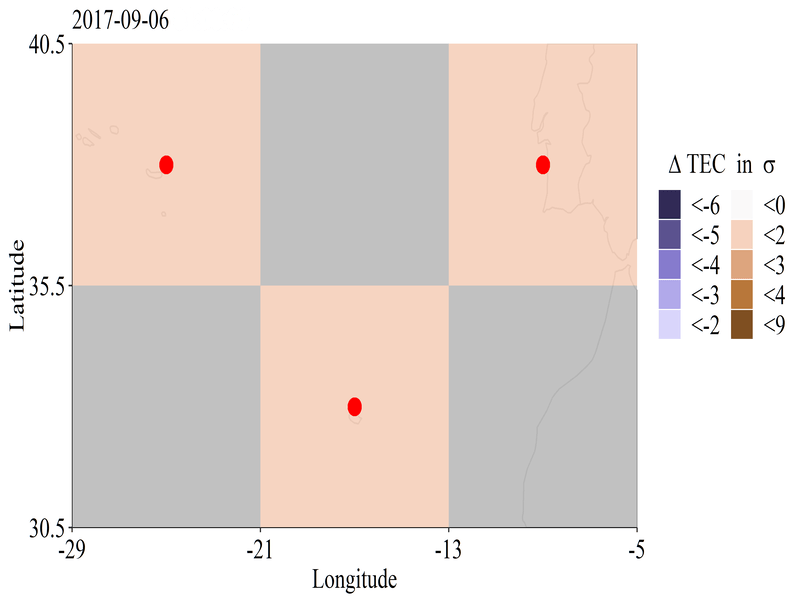


**Figure S5.** Animations showing average ΔTEC variations (in σ units – semi-transparent colour scale) for the studied locations for each of the analysed storms. September 2017.


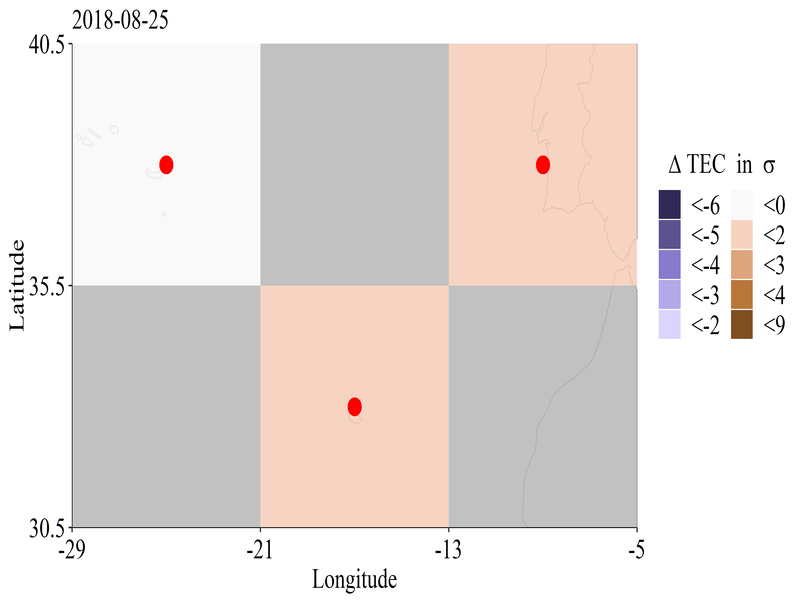


**Figure S6.** Animations showing average ΔTEC variations (in σ units – semi-transparent colour scale) for the studied locations for each of the analysed storms. August 2018.


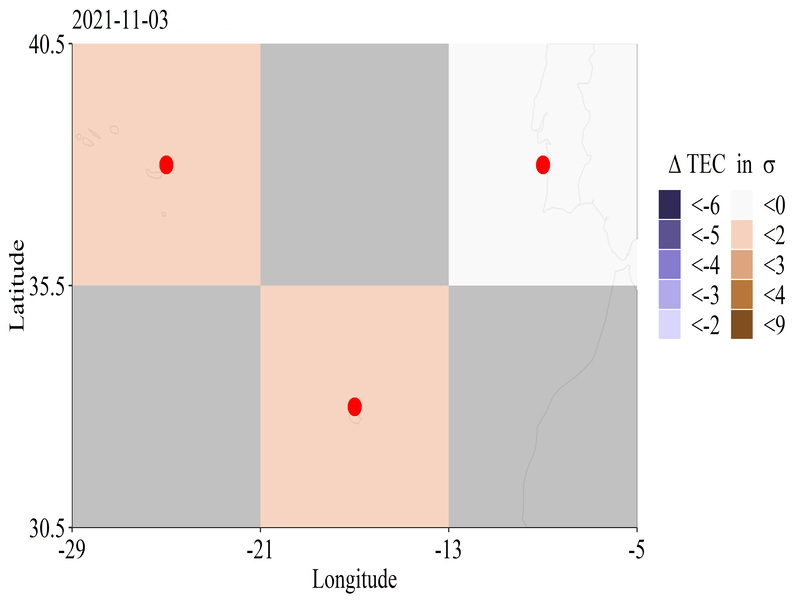


**Figure S7.** Animations showing average ΔTEC variations (in σ units – semi-transparent colour scale) for the studied locations for each of the analysed storms. November 2021.


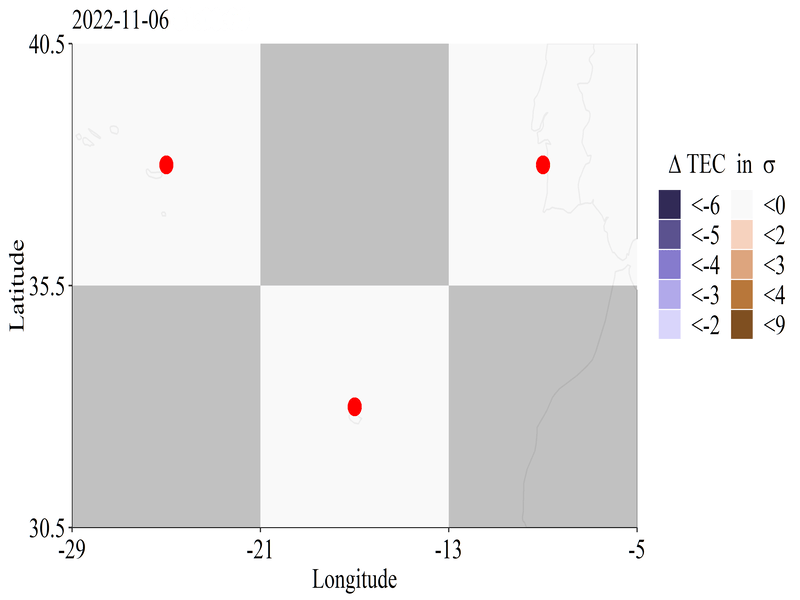


**Figure S8.** Animations showing average ΔTEC variations (in σ units – semi-transparent colour scale) for the studied locations for each of the analysed storms November 2022.
